# Supplementary material
Source: publisher site journal article supplement (https://www.dovepress.com/article/237804)

Supplemental material 1. NR1D2 expression were analyzed by western blot.


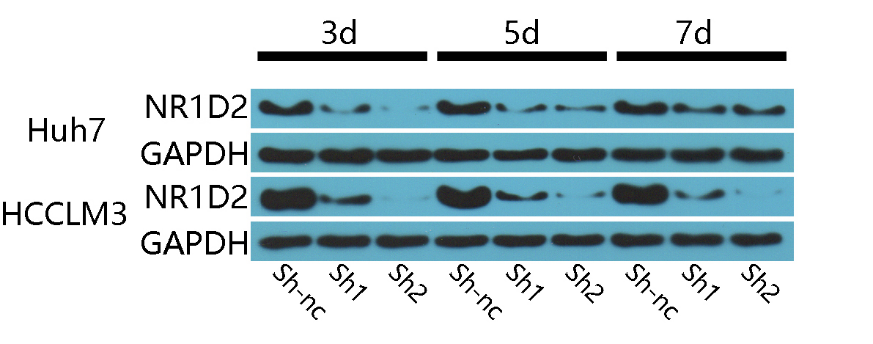


Supplemental material 2. NR1D2 expression were analyzed by flow cytometry at 72 h.


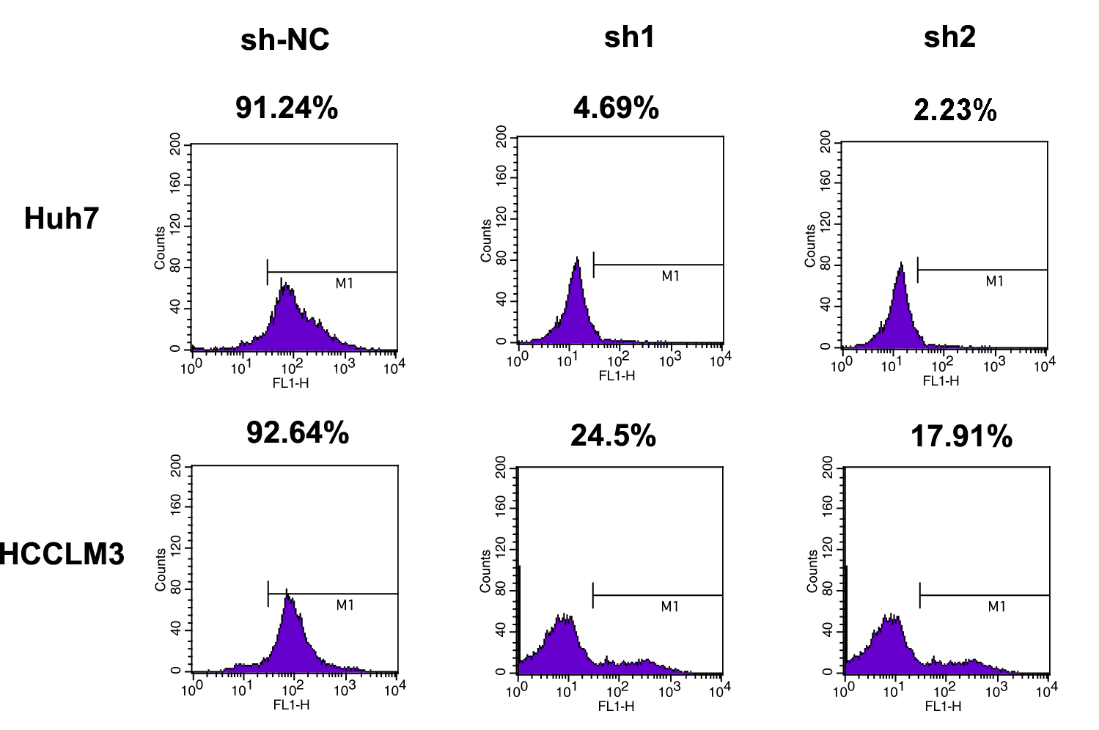

Supplement: Supplementary file 1 [file get_supplementary_file.php]
